# Supplementary material for: An in vitro tissue model for screening sustained release of phosphate-based therapeutic attenuation of pathogen-induced proteolytic matrix degradation
Source: Royal Society of Chemistry journal article supplement (doi:10.1039/c9tb02356a), 2020-01-01
Supplement: c9tb02356a1.pdf [file c9tb02356a1.pdf]

## Supplementary Information

### **An in vitro tissue model for screening sustained release of phosphate-based therapeutics in attenuating pathogen-induced proteolytic matrix degradation**

Marja B. Pimentel<sup>1</sup>, Fernando T.P. Borges<sup>2</sup>, Fouad Teymour<sup>2</sup>, Olga Y. Zaborina<sup>3</sup>, John C. Alverdy<sup>3</sup>, Kuili Fang<sup>2</sup>, Seok Hoon Hong<sup>2</sup>, Austeja Staneviciute<sup>1</sup>, Yusheng J. He<sup>1</sup> and Georgia Papavasiliou<sup>1\*</sup>

1. Department of Biomedical Engineering, Illinois Institute of Technology, Chicago, IL
2. Department of Chemical and Biological Engineering, Illinois Institute of Technology, Chicago, IL
3. Department of Surgery, University of Chicago, Chicago, IL

1 page containing 2 figures

Standard curve that correlates FITC-PPi concentration with fluorescence (RFU) for further measurement of release kinetics from nanoparticles.

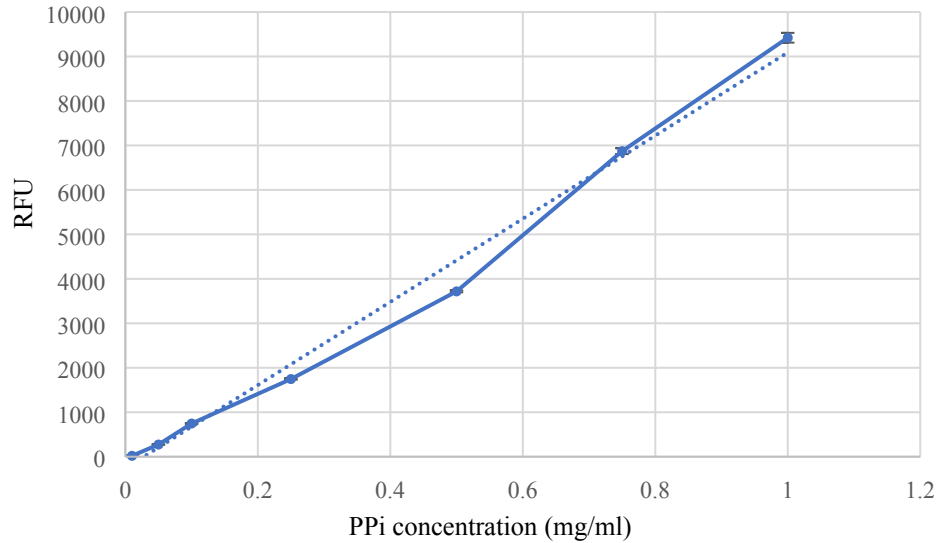

**Figure S1.** Standard curve of FITC-PPi concentration versus fluorescence (RFU)

Standard curve that correlates concentration with fluorescence (RFU) for further measurement of release kinetics from nanoparticles.

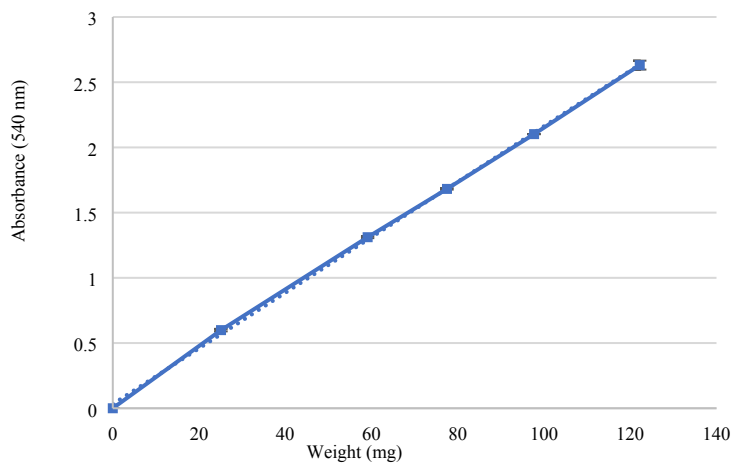

**Figure S2.** Standard curve of weight as a function of absorbance of Sirius red stained degradable PEG hydrogel scaffolds. Values are reported in terms of mean  $\pm$  standard deviation ( $n = 3$ ).
